# Supplementary material
Source: PubMed Central journal article supplement (PMC5909190)
Supplement: NIHMS954091-supplement-Supplemental.pdf [file NIHMS954091-supplement-Supplemental.pdf]

**Supplemental File**

**Applied Microbiology and Biotechnology**

**TCDD administered on activated carbon eliminates bioavailability and subsequent shifts to a key murine gut commensal**

Robert D. Stedtfeld<sup>a</sup>, J. Brett Sallach<sup>c</sup>, Robert B. Crawford<sup>c,d</sup>, Tiffany M. Stedtfeld<sup>a</sup>, Maggie R. Williams<sup>a</sup>, Hassan Waseem<sup>a</sup>, Cliff T. Johnston<sup>f</sup>, Hui Li<sup>e</sup>, Brian J. Teppen<sup>e</sup>, Norbert E. Kaminski<sup>c,d</sup>, Stephen A. Boyd<sup>e</sup>, James M. Tiedje<sup>b</sup>, Syed A. Hashsham<sup>a,b\*</sup>

<sup>a</sup>Department of Civil and Environmental Engineering, East Lansing, Michigan 48824

<sup>b</sup>Center for Microbial Ecology, Michigan State University, East Lansing, Michigan 48824

<sup>c</sup>Institute for Integrative Toxicology, Michigan State University, East Lansing, Michigan 48824

<sup>d</sup>Department of Pharmacology and Toxicology, Michigan State University, East Lansing, Michigan 48824

<sup>e</sup>Department of Plant, Soil, and Microbial Sciences, Michigan State University, East Lansing, Michigan, 48824

<sup>f</sup>Crop, Soil, and Environmental Science, Purdue University, West Lafayette, Indiana, 47907

\*Corresponding author:

Syed A. Hashsham, Ph. D.

Michigan State University

Center for Microbial Ecology

Department of Civil and Environmental Engineering

East Lansing, MI 48824-1319

Email: [hashsham@egr.msu.edu](mailto:hashsham@egr.msu.edu)

Phone: (517) 355 8241

Fax: (517) 355 0250

29

30 **Additional Experimental Procedure**

31 For comparing the influence of corn-oil (CO) vehicle with sesame-oil vehicle, which has been used in  
 32 previous studies (Stedtfeld et al. 2017), the relative abundance of *Enterobacteriaceae* was measured in  
 33 fecal pellets (Fig S6). In all groups, fecal pellets were collected daily and were therefore less than 24  
 34 hours old at the time of collection and freezing. All pellets were stored at -20°C until analyzed. DNA was  
 35 extracted from fecal pellets (100 mg) using the PowerMax Soil DNA Isolation Kit (MOBIO  
 36 Laboratories). DNA samples were quantified on a Nanodrop ND-1000 UV-Vis spectrophotometer  
 37 (Nanodrop Products, Wilmington, DE). Extracted DNA was stored at -20°C. The 16S rRNA gene assay  
 38 targeting *Enterobacteriaceae* (Barman et al. 2008) and universal 16S rRNA gene were run on the  
 39 Chromo4 BioRad using reagents and cycling parameters recommended with the Power SYBR Green PCR  
 40 Master Mix. Relative abundance of ARGs in the total bacterial community was determined by qPCR  
 41 using 16S rRNA gene designed to be universal to bacteria.

42

43 **Table S1** QPCR primers used to measure SFB specific 16S rRNA gene and putative functional genes.

| Gene or putative function        | Protein ID | Primer                                                              | Reference             |
|----------------------------------|------------|---------------------------------------------------------------------|-----------------------|
| Universal bacteria 16S rRNA gene |            | 340F: ACTCCTACGGGAGGCAGCAGT<br>541F: ATTACCGCGGCTGCTGGC             | (Barman et al. 2008)  |
| SFB specific 16S rRNA gene       |            | SFB_736F: GACGCTGAGGCATGAGAGCAT<br>SFB_844R: GACGGCACGGATTGTTATTCA  | (Bouskra et al. 2008) |
| actin-ADP-ribosylating toxin     | BAK56539   | TCTACCAATTAACATTTCTTGTTCAAATTC<br>GGTTGAAATAAGAGCACCTAAAGGAA        | This study            |
| ADPRT Type-1                     | BAK55983.1 | AAAAGATTATGATGTTGCCGTTTG<br>AACTGATGCTGATAAATACGATGCTT              | This study            |
| Arginase                         | BAK56991.1 | AGATGCTCATGGCGATTTGAA<br>GCATGCGAGTGGCATTCC                         | This study            |
| alpha-N-acetylglucosaminidase    | BAK55848.1 | TGTTAGATACAGTTTATAATCCGGTAACTG<br>AT<br>AATAGTTCCCCACTTAGACGCACTATT | This study            |
| aluminum resistance protein      | BAK56521.1 | GATAGCTAATTGCCCATGCTCAA<br>TCATGTGATGCTCCAATAAGAGAAC                | This study            |
| D-ala-D-ala dipeptidase          | BAK55824.1 | ACATCTACAGCACATGCCCTATTATG<br>GGATGCTTATAGACCATTTTACATTCAAA         | This study            |
| fibronectin binding protein      | BAK56752.1 | TGGTAGCCATGTTATCCTTGCA                                              | This study            |

|                                           |            |                                                                             |                    |
|-------------------------------------------|------------|-----------------------------------------------------------------------------|--------------------|
| flagellin domain-containing protein FliC2 | BAK56419   | TGAAGATGATGATGCCTTGCTATAAA<br>TGCTCAAGGTAAGGCAATGGA<br>AATTGCGAAACCTGCTGCAT | This study         |
| flagellin domain-containing protein FliC3 | BAK56361.1 | GCATTGTCCGAGACTCAAGCA<br>TCTGTATAAGTTCCGTTTGCAGATTG                         | This study         |
| F-pilin acetylation protein TraX          | BAK56001.1 | ATTTAGGACGTATTGTTGCACCTACAT<br>GCAGCAACAAACAATCTTATAGTAAATTTC               | This study         |
| GMP synthase, large subunit               | BAK56417.1 | TCTTCCATTAGGTTTTATAGCAAATGC<br>GGTGAAATTGAACCAGATGTATATTCTTAT<br>C          | This study         |
| hemolysin A                               | BAK56433.1 | GAGAGAGTTGTAGTGTGTTGAAAGGATGA<br>CAATTGATGCAAAAATCCCCTTTAT                  | (Stedtfeld et al.) |
| histidine kinase                          | BAK56282.1 | CTTGATAAGCAGATTGACATTATTAATTCG<br>ATTTCATAGGCCCTTTTATTATACGATCTAA           | This study         |
| metallo-beta-lactamase family protein     | BAK56334.1 | TCCATCGAAAGTTGATGCTATTGTT<br>TCCCATAAACCTTTCCTTTGTATCC                      | This study         |
| myosin-cross-reactive antigen             | BAK56130.1 | ATGAGGCATTTGCAAGACCTATTAA<br>AGATGCAAGTCCTGATCCAATAAGA                      | This study         |
| phospholipase C zinc binding proteins     | BAK56527.1 | ACCCAGACATCCAGTTTGATTTGT<br>TTTATGGTCCCTATTAAGGCAAGCT                       | This study         |
| polysaccharide deacetylase family protein | BAK56650.1 | TTTCGTCGTTGGAAGTTTGTT<br>TGTGTGAAGTCCTATCGAATGGTTATT                        | This study         |
| bleomycin resistance protein/dioxygenase  | BAK56236.1 | GTTGATTGTATATCATCGGTAAAGAATGTT<br>CAAATAGAAGGAAAATATACTTGGACAGA<br>AG       | This study         |
| RelA/SpoTdomain-containing protein        | BAK57096.1 | AGAGATGCTCAGAGATTATTTGATGTTAAA<br>CGCTGTAAGTTGCATTTGATAATTTG                | This study         |
| rubrerythrin                              | BAK56170.1 | GGAGAAGTTTTTTATAAGGCTCAAGATG<br>CTGGAGCATATCCCCATGTTC                       | (Stedtfeld et al.) |
| Type-3ADPRT                               | BAK56804.1 | CAAAGTAACTTCCGCAGTTGCA<br>AAGGTACTAACCAATTAACCTTACACTTTTG<br>AGA            | This study         |

N=5 Naive  
 N=5 vehicle corn oil (CO)  
 N=5 CO & 0.1 µg/kg TCDD  
 N=5 CO & 1.0 µg/kg TCDD  
 N=5 CO & 10 µg/kg TCDD  
 N=5 activated carbon (AC)  
 N=5 AC & 0.1 µg/kg TCDD  
 N=5 AC & 1.0 µg/kg TCDD  
 N=5 AC & 10 µg/kg TCDD

Five mice in each group, nine different groups

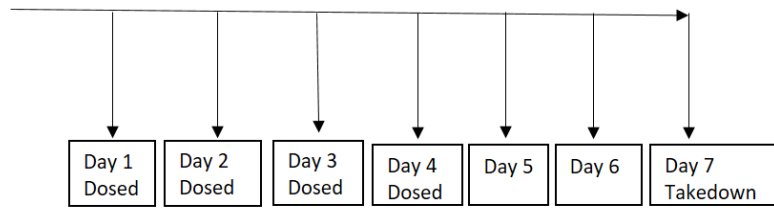

**Fig S1** Experimental design with nine groups, each with five mice. The vehicle of corn oil (CO) or activated carbon (AC) included 0, 0.1, 1.0 or 10 µg/kg TCDD. Dosing occurred on first four day of the experiment. No dosing was done on days 5, 6, and 7. The takedown and collection of ileal tissue was performed on day seven.

50

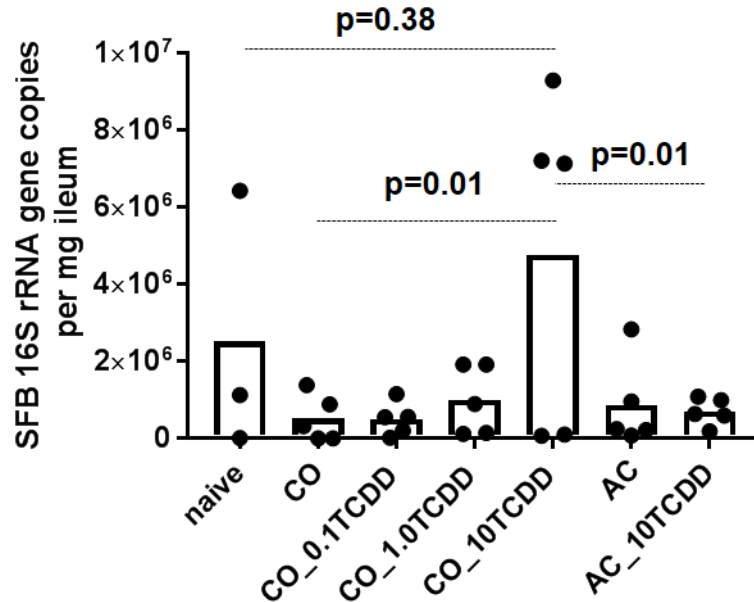

51

52 **Fig S2.** Results of the replicate experiment; qPCR analysis of SFB 16S rRNA gene expression from ileal  
 53 tissue in response to 0, 0.1, 1.0 or 10  $\mu\text{g/kg}$  TCDD administered with corn oil vehicle (CO\_TCDD) or  
 54 activated carbon (AC\_TCDD). ANOVA analysis with a multiple mean comparison Sidak test comparing  
 55 naïve, CO with no TCDD (CO), and 10  $\mu\text{g/kg}$  TCDD administered on AC (AC\_10TCDD) versus 10  
 56  $\mu\text{g/kg}$  TCDD administered on CO (CO\_10TCDD) was used to calculate p-values. For the replicate  
 57 experiment, SFB expression was not measured in groups of mice dosed with 0.1 and 1.0  $\mu\text{g/kg}$  TCDD  
 58 administered on AC.

59

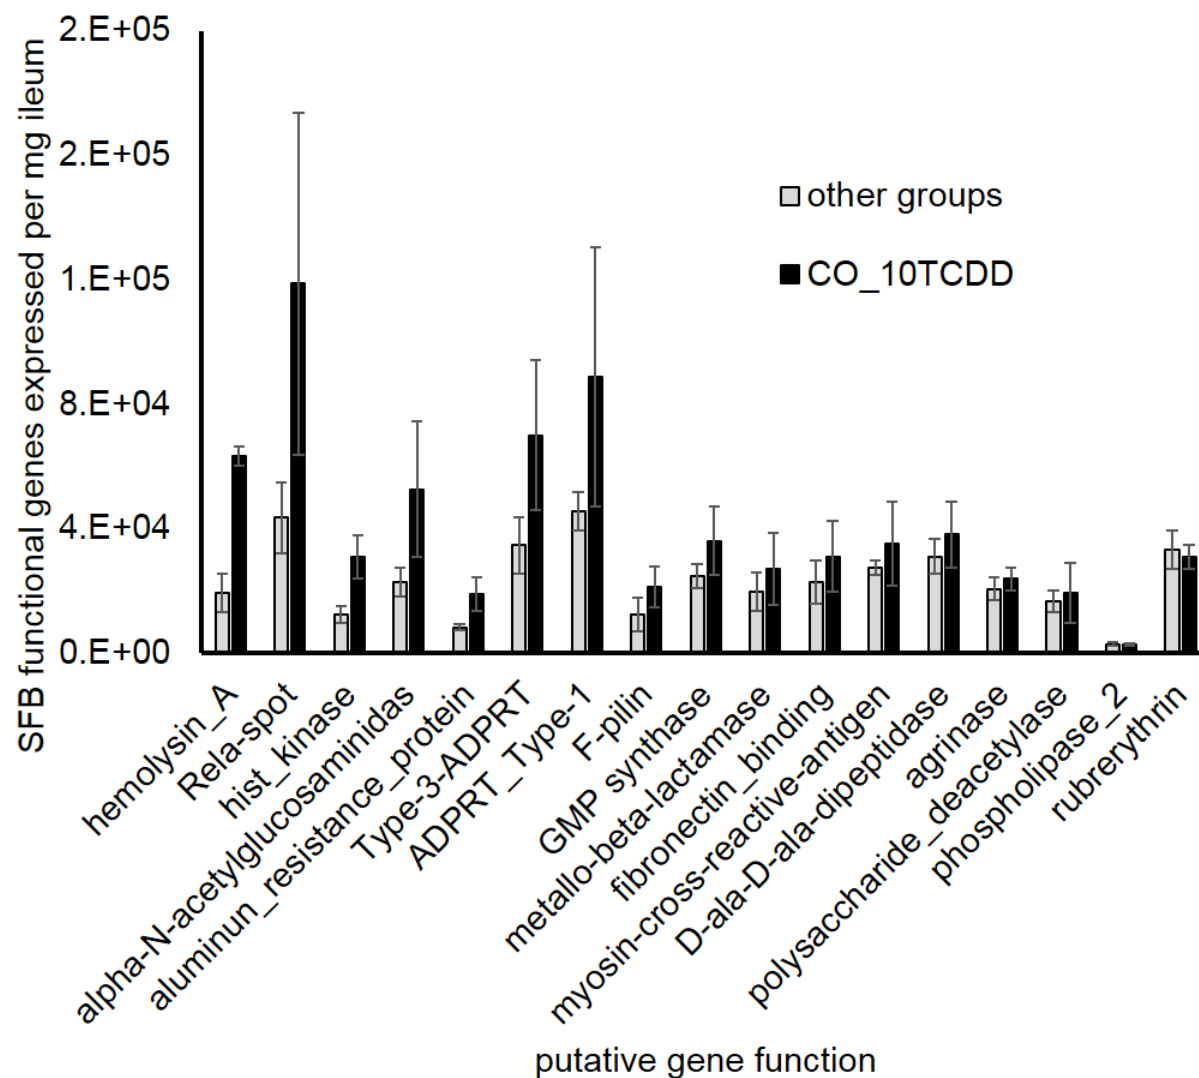

**Fig S3.** QPCR analysis of SFB gene expression from ileal tissue in response to 10  $\mu\text{g/kg}$  TCDD administered with corn oil vehicle (CO\_10TCDD) in black; and mean response of all other groups including naïve, lower doses of TCDD administered on CO and all doses of TCDD administered with AC in gray. Bars represent mean with standard error of expression per mg ileum. All other groups were pooled because a significant response was only observed in the group dosed with 10  $\mu\text{g/kg}$  TCDD administered with corn oil vehicle.

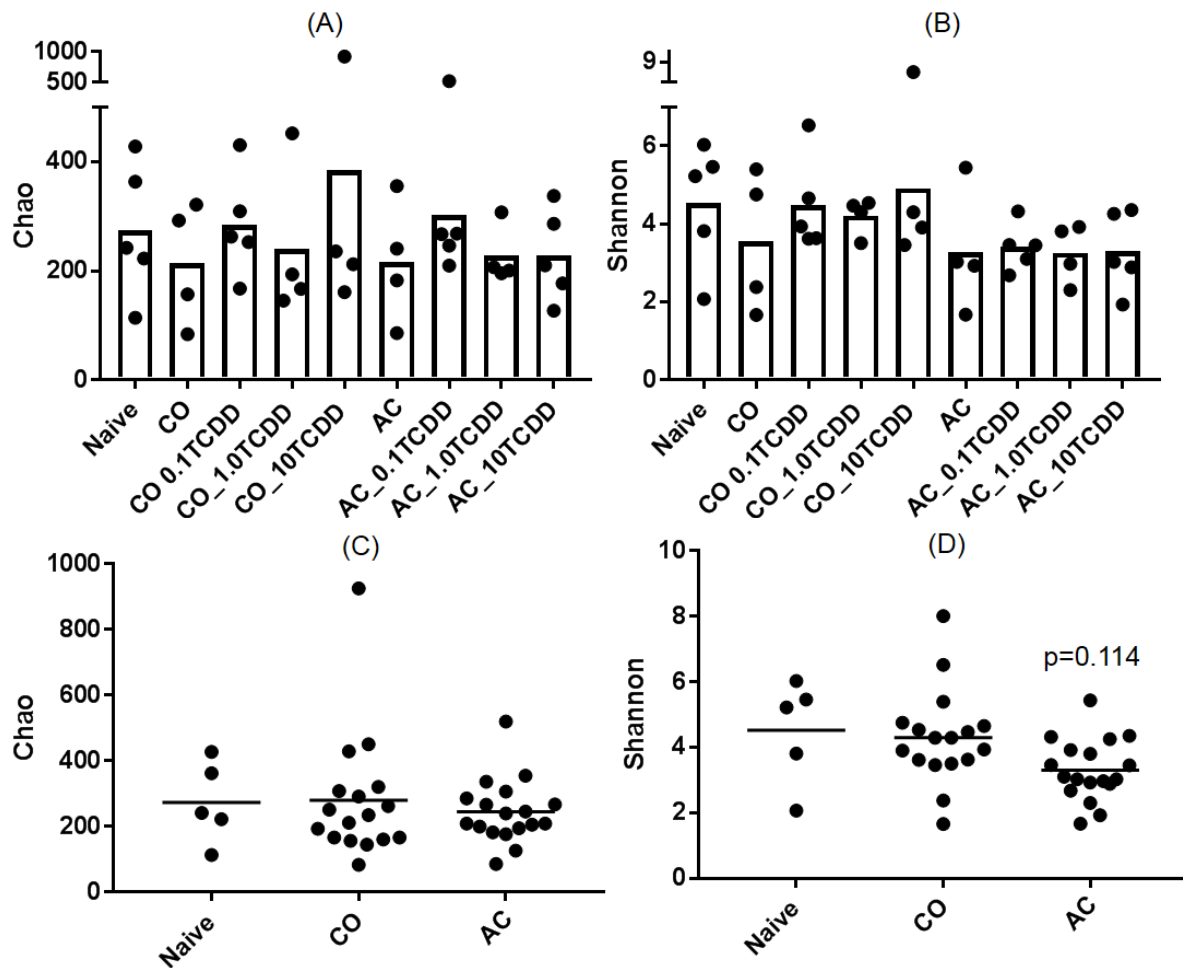

**Fig S4.** Analysis of bacterial community diversity in response to groups with various dosing, based on 16S rRNA gene sequencing of DNA extracted from ileal tissue. (A) Chao and (B) Shannon diversity indices in separate groups, and, (C) Chao and (D) Shannon diversity indices after grouping all mice dosed with and without TCDD. A significant difference was not observed with either the Chao or Shannon indices.

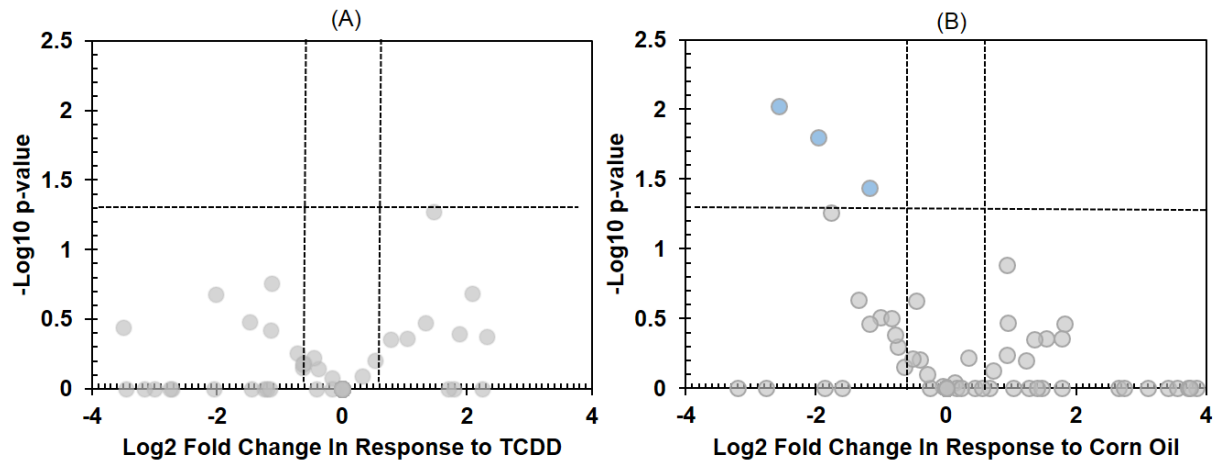

**Fig S5.** Volcano plots of 16S rRNA gene community structure classified at family level using DNA extracted from ileum with fold change as a response to TCDD (A) and, fold change in response to corn oil (B).

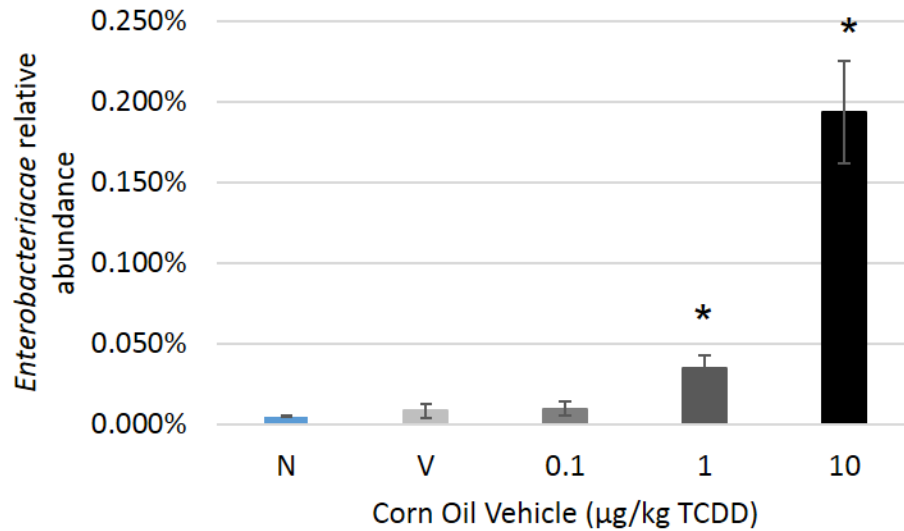

81

82 **Fig S6.** QPCR analysis of DNA extracted from fecal pellets collected from cages on the fifth day of the  
 83 experiment shows the relative abundance of *Enterobacteriaceae* within the different groups. Stars  
 84 indicates a significant difference ( $p < 0.05$ ) between TCDD and vehicle (V) dosed mice and the naïve  
 85 control (N). Error bars represent standard deviation of three technical replicates. Fecal pellets were  
 86 collected daily, and thus all pellets were less than 24 hrs old at the time of collection. Stars indicate  
 87 significant difference ( $p < 0.05$ ) compared to vehicle and naïve control.

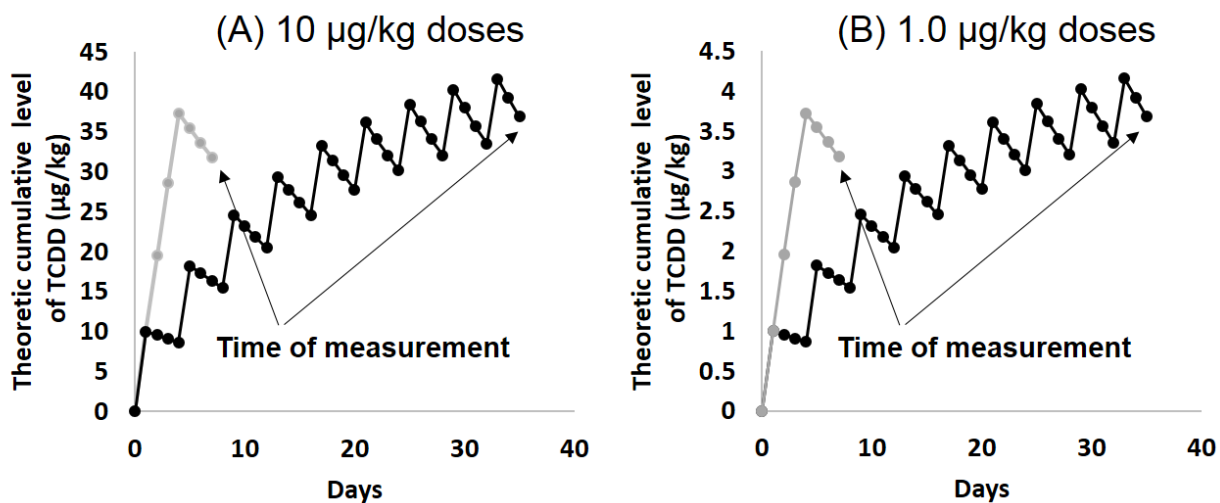

**Fig S7.** Theoretical analysis of TCDD levels in mice assuming an 11 day half-life. The black arrows point to the time of analysis, and the black lines shows theoretical amount of TCDD for a previous study (Bhaduri 2015) with longer duration of exposure. Gray lines indicate the level of TCDD in the mice for this current experiment.

**Supplemental References**

Barman M, Unold D, Shifley K, Amir E, Hung K, Bos N, et al. 2008. Enteric salmonellosis disrupts the microbial ecology of the murine gastrointestinal tract. *Infect Immun.* 76:907–15.

Bouskra D, Brézillon C, Bérard M, Werts C, Varona R, Boneca IG, et al. 2008. Lymphoid tissue genesis induced by commensals through NOD1 regulates intestinal homeostasis. *Nature.* 456:507–10; doi:10.1038/nature07450. Epub 2008 Nov 5.
